# Supplementary material
Source: publisher figshare collection journal article supplement (https://gsajournals.figshare.com/ndownloader/files/25139213)
Supplement: Supplementary file 1 [file 25139213]

**Supplementary Material Reference List**

Feng, Y., and Q. Xu, 2010 Pivotal role of hmx2 and hmx3 in zebrafish inner ear and lateral line development. Dev Biol 339**:** 507-518.

Higashijima, S. I., M. Schaefer and J. R. Fetcho, 2004a Neurotransmitter properties of spinal interneurons in embryonic and larval zebrafish. Journal of Comparative Neurology 480**:** 19-37.

Higashijima, S. I., G. Mandel and J. R. Fetcho, 2004b Distribution of prospective glutamatergic, glycinergic, and gabaergic neurons in embryonic and larval zebrafish. Journal of Comparative Neurology 480**:** 1-8.

Kimura, Y., Y. Okamura and S. Higashijima, 2006 alx, a zebrafish homolog of Chx10, marks ipsilateral descending excitatory interneurons that participate in the regulation of spinal locomotor circuits. J Neurosci 26**:** 5684-5697.

Madeira, F., Y. M. Park, J. Lee, N. Buso, T. Gur *et al.*, 2019 The EMBL-EBI search and sequence analysis tools APIs in 2019. Nucleic Acids Res 47**:** W636-W641.

Pfeffer, P. L., T. Gerster, K. Lun, M. Brand and M. Busslinger, 1998 Characterization of three novel members of the zebrafish *Pax2/5/8* family: dependency of *Pax5* and *Pax8* expression on the *Pax2.1* (*noi*) function. Development 125**:** 3063-3074.

Sordino, P., D. Duboule and T. Kondo, 1996 Zebrafish *Hoxa* and *Evx-2* genes: cloning, developmental expression and implications for the functional evolution of posterior *Hox* genes. Mech. Dev. 59**:** 165 - 175.

Thaeron, C., F. Avaron, D. Casane, V. Borday, B. Thisse *et al.*, 2000 Zebrafish *evx1* is dynamically expressed during embryogenesis in subsets of interneurones, posterior gut and urogenital system. Mechanisms of Development 99**:** 167-172.

Toyama, R., and I. Dawid, 1997 *lim6*, a novel LIM homeobox gene in the zebrafish: comparison of its expression pattern with *lim1*. Dev. Dyn. 209**:** 406-417.

Valentin, G., P. Haas and D. Gilmour, 2007 The chemokine SDF1a coordinates tissue migration through the spatially restricted activation of Cxcr7 and Cxcr4b. Curr Biol 17**:** 1026-1031.
